1  
2  
3  
4  
5  
6  
7  
8  
9  
10  
11  
12  
13

## Structure and mechanism of a primate ferroportin

Zhenning Ren<sup>1,\*</sup>, Shuai Gao<sup>2,\*</sup>, Jiemin Shen<sup>1,\*</sup>, Lie Wang<sup>1</sup>, Zhichun Xu<sup>1</sup>, Ye Yu<sup>1</sup>, Preetham Bachina<sup>1</sup>, Hanzhi Zhang<sup>1</sup>, Arthur Laganowsky<sup>3</sup>, Nieng Yan<sup>2</sup>, Ming Zhou<sup>1,#</sup>, Yaping Pan<sup>1,\*,#</sup>

<sup>1</sup>Verna and Marrs McLean Department of Biochemistry and Molecular Biology, Baylor College of Medicine, Houston, TX 77030, USA

<sup>2</sup>Department of Molecular Biology, Princeton University, Princeton, NJ 08544, USA

<sup>3</sup>Department of Chemistry, Texas A & M University, College Station, TX 77843, USA

\* These authors contributed equally to the work.

# Correspondence to M. Zhou (mzhou@bcm.edu) and Y. Pan (yaping.pan@bcm.edu)

14 **Abstract**

15 Ferroportin is the only cellular iron exporter in human and essential for iron homeostasis.

16 Mutations in ferroportin are associated with hemochromatosis or ferroportin diseases

17 characterized by a paradoxical combination of anemia and abnormal accumulation of iron in

18 cells. Ferroportin is also the target of hepcidin, which is a hormone that downregulates

19 ferroportin activity. However, due to a lack of three-dimensional structures, the mechanism of

20 iron transport by ferroportin and its regulation by hepcidin remains unclear. Here we present the

21 structure of a ferroportin from the primate Philippine tarsier (TsFpn) at 3.0 Å resolution

22 determined by cryo-electron microscopy. TsFpn has a structural fold common to major facilitator

23 superfamily of transporters and the current structure is in an outward-open conformation. The

24 structure identifies two potential ion binding sites with each site coordinated by two residues.

25 Functional studies demonstrate that TsFpn is a  $H^+/Fe^{2+}$  antiporter and that transport of one  $Fe^{2+}$  is

26 coupled to the transport of two  $H^+$  in the opposite direction such that the transport cycle is

27 electroneutral. Further studies show that the two ion binding sites affect transport of  $H^+$  and  $Fe^{2+}$

28 differently. The structure also provides mechanistic interpretation for mutations that cause

29 ferroportin diseases.

30

## 31 **Introduction**

32  
33 In mammals, ferroportin (Fpn) exports cellular iron and is highly expressed in enterocytes,  
34 hepatocytes and macrophages to distribute iron absorbed from food or recovered from digestion  
35 of senescent red blood cells<sup>1</sup>. Fpn also mediates iron transport across the placenta and thus is  
36 required for the normal development of embryos<sup>2</sup>. Fpn activity is regulated by hepcidin, a  
37 peptide hormone, which reduces Fpn activity by a combination of inhibiting the transport activity  
38 and promoting endocytosis of Fpn<sup>3,4</sup>. More than sixty Fpn mutations have been identified in  
39 human to cause ferroportin diseases<sup>5,6</sup> that are characterized by accumulation of iron inside of  
40 macrophages, highlighting its important physiological role in iron homeostasis. Fpn and its  
41 modulation by hepcidin has been the focus of targeted therapeutics for treating ferroportin  
42 diseases<sup>7-9</sup>.

43  
44 Fpn belongs to the solute carrier family 40 (SLC40A1)<sup>10-12</sup> and is a member of the major  
45 facilitator superfamily (MFS) of secondary transporters which includes the glucose transporter  
46 (GLUT1-5)<sup>13-15</sup>, peptide transporter (PEPT1, SLC15A1)<sup>16-18</sup>, and equilibrative nucleoside  
47 transporter<sup>19</sup>. Transporters of the MFS family share a common structural fold that has two  
48 homologous halves forming a clam-shell like architecture. A single substrate binding site is  
49 commonly located to the center of the clam-shell, and substrate translocation is achieved by  
50 rock-switch type motions of the two halves of the clam-shell so that the substrate binding site is  
51 alternatively exposed to either side of the membrane<sup>20</sup>. Structures of a bacterial homolog of Fpn  
52 (*Bdellovibrio bacteriovorus*; BbFpn) were reported recently<sup>21,22</sup>, which enhances our  
53 understanding of Fpn. However, BbFpn has ~20% sequence identity and 49% similarity to that

54 of human Fpn and may not depict an accurate representation of the mechanism of iron  
55 recognition and transport in human Fpn. We expressed and purified an Fpn from Philippine  
56 tarsier (*Tarcius syrichta* or *Carlito syrichta*; TsFpn), which is 92% identical and 98% similar to  
57 human Fpn, and we characterized its function and determined its structure.

58

### 59 **In vitro functional studies of TsFpn**

60

61 TsFpn is expressed and purified from insect cells and elutes as a single peak on a size-exclusion  
62 chromatography column. The elution volume is consistent with TsFpn being a monomer (Fig. 1a  
63 and Methods). TsFpn has three predicted N-linked glycosylation sites<sup>23</sup> and migrates as a  
64 diffused band on an SDS-PAGE, and addition of glycosidases PNGase F and EndoH helps focus  
65 the protein band (Fig. 1a), confirming that TsFpn is glycosylated.

66

67 We reconstituted the purified TsFpn protein into liposomes and measured transport of Fe<sup>2+</sup> using  
68 a flux assay (Fig. 1b and Methods). Liposomes reconstituted with TsFpn show significant Fe<sup>2+</sup>  
69 uptake while liposomes without the protein do not have significant change of fluorescence over  
70 time (Fig. 1c). Since Fe<sup>2+</sup> is easily oxidized under aerobic conditions, a reducing reagent (1 mM  
71 vitamin C) was added to the external solution to stabilize ferrous. Although ferrous transport can  
72 be observed, the addition of reducing reagents affects free Fe<sup>2+</sup> concentrations thereby  
73 complicating the measurement. Thus, Co<sup>2+</sup> was used to further characterize the transport activity  
74 of TsFpn. TsFpn mediates Co<sup>2+</sup> uptake and we measured the uptake at different Co<sup>2+</sup>  
75 concentrations. The initial rate of uptake versus ion concentration can be fit with a Michaelis  
76 Menten equation with a K<sub>M</sub> of 9.7 ± 3.26 μM and V<sub>max</sub> of 0.20 ± 0.03 ΔF/min (Fig.1d, e). TsFpn

77 is sensitive to human hepcidin<sup>3</sup>, and the inhibition reaches ~50% likely due to the random  
78 orientation of TsFpn on the liposomes (Fig. 1f). We also measured Co<sup>2+</sup> binding to the purified  
79 TsFpn using isothermal titration calorimetry (ITC) and found that the binding is exothermic with  
80 a  $\Delta H$  of  $-12.0 \pm 0.55$  kJ/mol and  $T\Delta S$  of  $9.29 \pm 0.38$  kJ/mol. TsFpn binds to Co<sup>2+</sup> with a  
81 dissociation constant ( $K_d$ ) of  $182.6 \pm 16.8$   $\mu$ M (Fig. 1g).

82

### 83 **Structure of TsFpn**

84

85 We prepared monoclonal antibodies against TsFpn to facilitate its structural determination<sup>24</sup>  
86 (Methods). TsFpn forms a stable complex with the antigen binding fragment (Fab) of a  
87 monoclonal antibody 11F9 as indicated by a shift in the retention time of the elution peak on the  
88 size-exclusion column (Extended Data Fig. 1a-b). To assess the effect of 11F9 Fab on TsFpn, we  
89 examined Co<sup>2+</sup> binding and transport in the presence of the Fab. Fab-TsFpn complex has a  
90 modestly reduced affinity to Co<sup>2+</sup> with a  $K_d$  of  $258.2 \pm 34.2$   $\mu$ M (Extended Data Fig. 2a).  
91 However, addition of the Fab inhibits Co<sup>2+</sup> uptake, and the inhibition reaches ~50% at 1  $\mu$ M of  
92 Fab (Extended Data Fig. 2b-c). These results suggest that the Fab has a modest effect on ion  
93 binding and a pronounced effect on ion transport, likely by hindering conformational changes of  
94 TsFpn.

95

96 We reconstituted TsFpn-11F9 into nanodisc (Extended Data Fig. 1a) and prepared cryo-EM grids  
97 in the presence of 10 mM of Co<sup>2+</sup>. The images show recognizable particles of TsFpn-11F9  
98 complex and we were able to obtain a final map at 3.0 Å overall resolution (Fig. 2a, Extended  
99 Data Figs. 3 and 4 and Extended Data Table 1). The map shows clear density for all

100 transmembrane helices and resolves most of the side chains (Extended Data Fig. 5) to allow *de*  
101 *novo* building of the TsFpn structure. The final structure model includes residues 17 to 237, 289  
102 to 395 and 453 to 552. The N-terminal 16 residues, two loops between TM6 and 7 and TM9 and  
103 10, and C-terminal 25 residues were not resolved. These regions are predicted to be unstructured  
104 (Extended Data Fig. 6). For the Fab fragment, the constant region was not fully resolved and was  
105 built as poly alanines while the variable region is well resolved with a local resolution close to  
106 2.9 Å (Extended Data Fig. 3).

107  
108 TsFpn adopts a canonical MFS fold<sup>25</sup>. The 12 transmembrane helices are packed into two clearly  
109 defined domains. TM1-6 form the N-domain, and TM7-12 the C-domain (Fig. 2b-d). Based on  
110 previous studies of human Fpn topology<sup>26</sup> and the “positive-inside” rule<sup>27</sup>, both the N- and C-  
111 termini are located to the cytosolic side. The two domains are connected by a long intracellular  
112 loop between TM6 and TM7. Part of the loop is an amphipathic helix that extends horizontally  
113 and oriented parallel to the intracellular surface of the membrane (Fig. 2b).

114  
115 TsFpn structure is in an outward facing conformation. The N- and C-domains make contact at  
116 the cytosolic side. Asp157 on TM4 is in close proximity to Arg88 on TM3 and Arg490 on TM11  
117 and could form salt bridges with the arginines (Fig. 2d). These residues are conserved in the  
118 MFS family of transporters and are commonly known as the motif-A<sup>25</sup>. Other interactions  
119 between the N- and C-domains include Arg178 in the N-domain and Asp474 in the C-domain,  
120 and Asn174 in the N-domain and Gln482 in the C-domain. These interacting pairs of residues are  
121 conserved in human Fpn (Extended Data Fig. 6) and mutations to Arg88, Asp157, Asn174,  
122 Arg178, and Arg490 are known to cause ferroportin diseases<sup>5,28,29</sup>.

123

## 124 **Potential metal ion binding sites**

125

126 TsFpn structure has a large solvent-accessible central cavity between the N- and C-domains (Fig.

127 2e). Residues lining the cavity are mostly charged or hydrophilic, and although there are several

128 arginine residues, the electrostatic surface potential of the cavity is highly negative (Fig. 2e).

129 Two strong non-protein densities stand out in the cavity and we assigned the two as potential

130 metal ion binding sites. The first site, S1, is coordinated by Asp39 and His43, and the second site,

131 S2, Cys326 and His508 (Fig. 3a-c). S1 is located in the N-domain while S2 is in the C-domain.

132 The densities at S1 and S2 are comparable to surrounding residues (Fig. 3b-c). Both S1 and S2

133 are solvent accessible from the extracellular side, and the distance between the two sites are 16.0

134 Å as measured between the two ions. These two metal ion binding sites are unusual because both

135 the S1 and S2 sites are coordinated by only 2 residues, which is very different from the ion

136 binding sites identified in other transition metal ion transporters of known structures, such as

137 NRAMP<sup>30,31</sup>, VIT1<sup>31</sup>, YiiP<sup>32</sup>, ZIP<sup>33</sup> and ZneA<sup>34</sup>, all of which have at least four residues

138 coordinating a metal ion binding site. In addition, S2 does not have a charged residue making

139 direct contact with the bound ion, although two negatively charge residues, Asp325 and Asp505

140 are located close to S2 and could potentially interact with Cys326 and His508, respectively. It is

141 also unusual to have two substrate binding sites because most other members of the MFS family

142 of transporters have a single substrate binding site often coordinated by residues from both the

143 N- and C-domains<sup>13-19</sup>. To further understand how S1 and S2 may participate in ion transport, we

144 examined the binding sites with functional studies.

145

146 **TsFpn is an electroneutral H<sup>+</sup>/Fe<sup>2+</sup> antiporter**

147

148 As a first test to validate the ion binding sites, we examined pH dependency of metal ion binding  
149 and transport in TsFpn because both the S1 and S2 sites contain a histidine. TsFpn does not bind  
150 to Co<sup>2+</sup> in pH 6.0, and the binding affinity gradually recovers as pH increases from 6.0 to 8.0  
151 (Extended Data Figs.1c and 7a-f). Similarly, Co<sup>2+</sup> uptake is significantly reduced when external  
152 pH is 6.5, and the uptake gradually increases as external pH increases from 6.5 to 8.5 (Fig. 4a).  
153 These results are consistent with the presence of histidine residues at the ion binding site and  
154 provide the first systematic evaluation of pH dependency of ion binding and transport in Fpn.

155

156 Intrigued by the drastically enhanced Co<sup>2+</sup> uptake at elevated pH (8.0 and 8.5), we wondered  
157 whether it was the lower H<sup>+</sup> concentration or the H<sup>+</sup> gradient responsible for enhanced metal ion  
158 transport. Ion transport under symmetrical pH 8.0 or 8.5 is not significantly different from that in  
159 symmetrical pH 7.5 (Fig. 4b), indicating that metal ion uptake is enhanced by the pH gradient,  
160 i.e., a higher H<sup>+</sup> concentration inside of the liposomes. These results suggest that TsFpn is a  
161 H<sup>+</sup>/Fe<sup>2+</sup> antiporter in which metal ion transport is coupled to H<sup>+</sup> movement in the opposite  
162 direction. We further tested this hypothesis in the following three experiments.

163

164 We first varied salt composition in the assay buffer and we found that neither Na<sup>+</sup>, K<sup>+</sup> nor Cl<sup>-</sup>  
165 enhances metal ion transport (Fig. 4c). Second, we measured proton transport directly in a flux  
166 assay. In this experiment, uptake of H<sup>+</sup> is monitored by a proton sensitive fluorescent dye  
167 pyranine trapped inside of the liposomes and the H<sup>+</sup> uptake is driven by efflux of Co<sup>2+</sup> (Fig. 4d-e  
168 and Methods). This result confirms the coupled movement of H<sup>+</sup> and Co<sup>2+</sup> in opposite directions.



169 Third, we determined the stoichiometry of the coupled  $H^+$  and  $Co^{2+}$  movement by examining if  
170 metal ion transport in TsFpn is affected by a membrane potential. We set the membrane potential  
171 at  $\sim -120$  mV by having a 100-fold  $K^+$  concentration gradient in the presence of a  $K^+$  selective  
172 ionophore valinomycin. Membrane potential of a vesicle is defined assuming 0 mV at outside.  
173 We found that the membrane potential has no effect on the rate of either  $Fe^{2+}$  or  $Co^{2+}$  uptake (Fig.  
174 4f-g). This result indicates that metal ion transport in TsFpn is electroneutral and that the most  
175 likely stoichiometry of  $H^+$  to  $Fe^{2+}$  is 2 to 1. Taken together, our results led to the conclusion that  
176 TsFpn is an electroneutral  $2H^+/Fe^{2+}$  antiporter.

177

### 178 **Mutational study of metal ion binding sites**

179

180 As a second test to validate the ion binding sites, we made mutations to the S1 and S2 binding  
181 sites and measured ion binding and transport. Two double mutations were made: the S1 mutation,  
182 i.e., Asp39Ala-His43Ala, and the S2 mutation, i.e., Cys326Ala-His508Ala. Both the S1 and S2  
183 mutations can be purified and are stable after purification (Extended Data Fig. 1d-e). We  
184 measured metal ion transport in symmetrical pH 7.5 and with a pH gradient (pH7.5 inside and  
185 pH 8.5 outside), and we determined if ion transport remains electroneutral.

186

187 The S1 mutation has similar transport activity to that of the wild type TsFpn in symmetrical pH  
188 7.5. It has a modest increase in transport activity under the pH gradient conditions and the  
189 increase is much smaller than the increase observed in the wild type (Fig. 4b and 4h). This result  
190 indicates that the coupled transport of  $H^+$  and  $Co^{2+}$  is affected by the S1 mutation. Consistent  
191 with this conclusion,  $Co^{2+}$  transport in the S1 mutation becomes electrogenic and shows a large

192 increase in transport activity under a membrane potential of  $\sim -120$  mV (Fig. 4i). Enhanced  $\text{Co}^{2+}$   
193 transport under  $-120$  mV indicates that less than two  $\text{H}^+$  is transported for each  $\text{Co}^{2+}$ , i.e.,  $\text{H}^+$   
194 transport is impaired. Since  $\text{Co}^{2+}$  transport is about similar to that of the wild type in symmetrical  
195 pH, it is likely the S1 mutation affects  $\text{H}^+$  transport.

196

197 The S2 mutation has significantly lower transport activity than that of the wild type under both  
198 the symmetrical and pH gradient conditions. Transport activity is enhanced in the pH gradient,  
199 although it is difficult to determine if the enhancement is similar to that of the wild type (Fig. 4h).  
200  $\text{Co}^{2+}$  transport is also enhanced under  $-120$  mV membrane potential, indicating that less than 2  
201  $\text{H}^+$  is transported for each  $\text{Co}^{2+}$  (Fig. 4i). Since  $\text{Co}^{2+}$  transport is significantly lower in  
202 symmetrical pH, it is likely the S2 mutation affects both  $\text{H}^+$  and  $\text{Co}^{2+}$  transport.

203

204 Both S1 and S2 mutations can still transport proton and the effects of the mutations mirror the  
205 effects observed in the  $\text{Co}^{2+}$  transport assay (Fig.4j). Combined, these results led us to conclude  
206 that both the S1 and S2 sites are important for  $\text{H}^+$  transport, while for  $\text{Co}^{2+}$  transport the S2 site is  
207 critical and the S1 site seems redundant. Because the S2 mutation maintains a small yet  
208 significant level of transport, it is likely that the S1 site could mediate metal ion transport but not  
209 as efficiently.

210

211 To estimate how the two sites contribute to metal ion binding, we measured  $\text{Co}^{2+}$  binding to the  
212 S1 and S2 mutations by ITC. The S1 mutation binds to  $\text{Co}^{2+}$  with a  $K_d$  of  $266.3 \pm 23.8$   $\mu\text{M}$ , and  
213 the S2 mutation binds to  $\text{Co}^{2+}$  with a  $K_d$  of  $162.4 \pm 16.0$   $\mu\text{M}$  (Extended Data Fig. 7g-h). When  
214 both sites are mutated (Asp39Ala/His43Ala/Cys326Ala/His508Ala), the binding affinity

215 becomes  $616.0 \pm 44.9 \mu\text{M}$  (Extended Data Figs. 1f and 7i). These results suggest that both S1  
216 and S2 site contribute to metal ion binding.

217

## 218 **Discussion**

219

220 In summary, we solved the structure of TsFpn in an outward-facing conformation and we  
221 identified two potential metal ion binding sites S1 and S2. We also found that TsFpn is a  $\text{H}^+/\text{Fe}^{2+}$   
222 antiporter and the transport of each  $\text{Fe}^{2+}$  is coupled to two  $\text{H}^+$ . Further studies showed that both  
223 S1 and S2 sites are involved in  $\text{H}^+$  transport while the S2 site is more critical to metal ion  
224 transport.

225

226 We generated a model of TsFpn in the inward facing conformation by aligning the N- and C-  
227 domains separately on their equivalent domains in the inward-open bacterial BbFpn structure<sup>21</sup>  
228 (Extended Data Fig. 8a). The transmembrane domains of the two structures align reasonably well  
229 with a root mean square distance of  $3.6 \text{ \AA}$  for the N-domain and that  $2.1 \text{ \AA}$  for the C-domain.  
230 Both the S1 and S2 sites are solvent accessible in the inward-facing model of TsFpn (Extended  
231 Data Fig. 8b), suggesting that a canonical rock-switch type motion of the N- and C-domains  
232 could achieve alternating access to the substrates (Fig.5a-d). We speculate that two  $\text{H}^+$  could  
233 bind to both S1 and S2 and be transported across the membrane, while one  $\text{Fe}^{2+}$  could bind to  
234 either S1 or S2 sites and be transported in the opposite direction. Further study is required to  
235 reveal details of how structural changes during the transport allow the two sites to coordinate and  
236 transport  $\text{H}^+$  and  $\text{Fe}^{2+}$  in opposite directions.

237

238 Although TsFpn and BbFpn share the same MFS fold, the S1 and S2 binding sites in TsFpn  
239 differ from the ion binding sites identified in BbFpn. The metal ion binding site identified in the  
240 initial BbFpn structure is formed by residues Thr20, Asp24, Asn196, Ser199, and Phe200, and  
241 these residues correspond to Ser35, Asp39, Asn212, Ser215, and Met216 in TsFpn (Extended  
242 Data Figs. 6 and 9a-b). However, only Asp39 is involved in S1 and when the two structures are  
243 aligned, the two binding sites are 8.6 Å away (Extended Data Fig. 9a). In a more recent  
244 publication, another metal ion binding site was identified in the BbFpn formed by residues  
245 Trp254, His261 and Thr386. However, the new metal ion binding site contains an EDTA  
246 molecule that helps coordinate a bound metal ion<sup>22</sup>. This site is close to S2 in TsFpn, however,  
247 none of the coordinating residues are part of the S2 (Extended Data Figs. 6 and 9c). Bacterial  
248 BbFpn was also shown to have higher rate of uptake when external pH increases, but the  
249 enhanced transport was due to the pH and not the pH gradient<sup>21</sup>. This result indicates that BbFpn  
250 has a different metal ion transport mechanism.

251  
252 We mapped known missense mutations that cause ferroportin diseases onto the TsFpn structure  
253 (Fig. 5e). The structure provides insights into how certain mutations may lead to diseases. For  
254 example, six mutations are mapped to regions close to S1 or S2 and these mutations likely affect  
255 ion binding. Eighteen mutations are mapped to regions where the N- and C-domain make contact  
256 in the current structure and these mutations likely affect transport activity. Moreover, we show  
257 that transport activity of TsFpn is inhibited by human hepcidin, and we mapped residues known  
258 to affect hepcidin inhibition to the TsFpn structure<sup>3</sup>. These residues cluster mostly on the  
259 extracellular surface with a few deeper into the cavity including Cys326 of the S2 site. It appears  
260 that hepcidin could perturb either H<sup>+</sup> or Fe<sup>2+</sup> binding by interacting with the S2 site.

261

## 262 **Methods**

### 263 **Cloning, expression, and purification of TsFpn**

264 The Fpn gene (accession number XP\_008060857) from *Carlito syrichta* (*Tarsius syrichta*,  
265 Philippine tarsier) was codon-optimized and cloned into a pFastBac dual vector<sup>32</sup> for production  
266 of baculovirus by the Bac-to-Bac method (Invitrogen). High Five Cells (Thermofisher) at a  
267 density of  $\sim 3 \times 10^6$  cells/ml were infected with baculovirus and grown at 27 °C for 60-70 hour  
268 before harvesting. Cell membranes were prepared following a previous protocol<sup>32</sup> and frozen in  
269 liquid nitrogen.

270 Purified membranes were thawed and homogenized in 20 mM HEPES, pH 7.5, 150 mM NaCl  
271 and 2mM  $\beta$ -mercaptoethanol, and then solubilized with 1% (w/v) Lauryl Maltose Neopentyl  
272 Glycol (LMNG, Anatrace) at 4 °C for 2 h. After centrifugation (55,000g, 45min, 4 °C), TsFpn  
273 was purified from the supernatant using a cobalt-based affinity resin (Talon, Clontech) and the  
274 His<sub>6</sub>-tag was cleaved by TEV protease at room temperature for 1 hour. TsFpn was then  
275 concentrated to 3-6 mg/ml (Amicon 50 kDa cutoff, Millipore) and loaded onto a size-exclusion  
276 column (SRT-3C SEC-300, Sepax Technologies, Inc.) equilibrated with 20 mM HEPES, pH7.5,  
277 150 mM NaCl, 1 mM (w/v) n-dodecyl- $\beta$ -D-maltoside (DDM, Anatrace).

278

279 Mutations to TsFpn were generated using the QuikChange method (Stratagene) and the entire  
280 cDNA was sequenced to verify the mutation. Mutants were expressed and purified following the  
281 same protocol as wild type.

282

### 283 **Generation of monoclonal antibodies and Fab fragments**

284 Monoclonal antibodies against the TsFpn (IgG2b,  $\kappa$ ) were raised using standard methods  
285 (Monoclonal Core, Vaccine and Gene Therapy Institute, Oregon Health & Science University).  
286 High affinity and specificity of the antibodies for properly folded TsFpn was assayed by ELISA  
287 and western blot (no binding). Three out of twenty antibodies were selected for large scale  
288 production. Fab fragments were generated by papain cleavage of whole antibody at a final  
289 concentration of 1 mg/mL for 2 hours at 37 °C in 50 mM Phosphate buffer saline, pH 7.0, 1 mM  
290 EDTA, 10 mM cysteine and 1:50 w:w papain:antibody. Digestion was quenched using 30 mM  
291 iodoacetamide at 25 °C for 10 min. Fab was purified by anion exchange using a Q Sepharose  
292 (GE Healthcare) column in 10 mM Tris, pH 8.0 and a NaCl gradient elution. TsFpn-Fab  
293 complexes were further verified by size-exclusion chromatography (shift in elution volume and  
294 SDS-PAGE) and 11F9 was selected for structural studies.

295

### 296 **TsFpn-11f9(Fab) complex**

297 Purified TsFpn was mixed with the 11F9 Fab at 1:1.1 molar ratio and incubated 30 min on ice.  
298 The complex was then concentrated to 3-6 mg/ml (Amicon 100 kDa cutoff, Millipore) and  
299 loaded onto a size-exclusion column equilibrated with 20 mM HEPES, pH7.5, 150 mM NaCl, 1  
300 mM n-dodecyl- $\beta$ -D-maltoside (DDM, Anatrace). The TsFpn-Fab complex was used in the ITC  
301 measurement of  $\text{Co}^{2+}$  binding and in nanodisc reconstitution for cryo-EM grid preparations.

302

### 303 **Nanodisc reconstitution**

304 MSP1D1 was expressed and purified following an established protocol<sup>33</sup>. For lipid preparation,  
305 1-palmitoyl-2-oleoyl-sn-glycero-3-phospho-(1'-rac)-choline (POPC, Avanti Polar Lipids), 1-  
306 palmitoyl-2-oleoyl-sn-glycero-3-phospho-(1'-rac)-ethanolamine (POPE, Avanti Polar Lipids)

307 and 1-palmitoyl-2-oleoyl-sn-glycero-3-phospho-(1'-rac)-glycerol (POPG, Avanti Polar Lipids)  
308 were mixed at a molar ratio of 3:1:1, dried under Argon and resuspended with 14 mM DDM<sup>34</sup>.  
309 For nanodisc reconstitution, TsFpn, Fab of 11f9, MSP1D1 and lipid mixture were mixed at a  
310 molar ratio of 1:(1.1):(2.5):(62.5) and incubated on ice for 1 hour. Detergents were removed by  
311 incubation with Biobeads SM2 (Bio-Rad) overnight at 4 °C. The protein lipid mixture was  
312 loaded onto a size-exclusion column equilibrated with 20 mM HEPES, pH7.5, 150 mM NaCl.  
313 The purified nanodisc elutes at 13.6 ml and was concentrated to 13 mg/ml and incubated with 10  
314 mM CoCl<sub>2</sub> for 30 min before cryo-EM grid preparation.

315

### 316 **Cryo-EM sample preparation and data collection**

317 The cryo grids were prepared using Thermo Fisher Vitrobot Mark IV. The Quantifoil R1.2/1.3  
318 Cu grids were glow-discharged with air for 15 sec at 10 mA in a Plasma Cleaner (PELCO  
319 EasiGlow<sup>TM</sup>). Aliquots of 3.5 µl purified TsFpn-11f9 in nanodisc were applied to glow-  
320 discharged grids. After being blotted with filter paper (Ted Pella, Inc.) for 4.0 s, the grids were  
321 plunged into liquid ethane cooled with liquid nitrogen. A total of 1838 micrograph stacks were  
322 collected with SerialEM<sup>35</sup> on a Titan Krios at 300 kV equipped with a K2 Summit direct electron  
323 detector (Gatan), a Quantum energy filter (Gatan) and a Cs corrector (Thermo Fisher), at a  
324 nominal magnification of 105,000 × and defocus values from -2.0 µm to -1.2 µm. Each stack  
325 was exposed in the super-resolution mode for 5.6 s with an exposing time of 0.175 s per frame,  
326 resulting in 32 frames per stack. The total dose rate was about 50 e<sup>-</sup>/Å<sup>2</sup> for each stack. The stacks  
327 were motion corrected with MotionCor2<sup>36</sup> and binned 2 fold, resulting in a pixel size of 1.114  
328 Å/pixel. In the meantime, dose weighting was performed<sup>37</sup>. The defocus values were estimated  
329 with Gctf<sup>38</sup>.

330

### 331 **Cryo-EM data processing**

332 A total of 1,246,999 particles were automatically picked with RELION 2.1<sup>39-41</sup>. After 2D  
333 classification, a total of 946,473 particles were selected and subject to a global angular search 3D  
334 classification with one class and 40 iterations. The outputs of the 35th-40th iterations were  
335 subjected to local angular search 3D classification with four classes separately. A total of  
336 571,511 particles were selected by combining the good classes of the local angular search 3D  
337 classification. After handedness correction, a skip-align classification procedure was performed  
338 to further classify good particles, yielding a total of 215,752 particles, which resulted into a  
339 reconstruction with an overall resolution of 3.1 Å after 3D auto-refinement with an adapted mask.  
340 The resolution of the map was further improved to 3.0 Å after Bayesian polishing<sup>42</sup>.

341

342 All 2D classification, 3D classification, and 3D auto-refinement were performed with RELION  
343 2.1 or RELION 3.0. Resolutions were estimated with the gold-standard Fourier shell correlation  
344 0.143 criterion<sup>43</sup> with high-resolution noise substitution<sup>44</sup>.

345

### 346 **Model building and refinement**

347 For *de novo* model building of TsFpn-11F9 complex, a ploy-Alanine model was first manually  
348 built into the 3.0 Å density map in COOT<sup>45</sup> and side chains were added next. Structure  
349 refinements were carried out by PHENIX in real space with secondary structure and geometry  
350 restraints<sup>46</sup>. The EMRinger Score was calculated as described<sup>47</sup>.

351

### 352 **Proteoliposome preparation**



353 POPE and POPG (Avanti Polar Lipids) was mixed at 3:1 molar ratio, dried under Argon and  
354 vacuumed overnight to remove chloroform. The lipid was resuspended in the reconstitution  
355 buffer (20 mM HEPES, pH 7.5, 100 mM NaCl) to a final concentration of 10 mg/ml, sonicated  
356 to transparency and incubated with 40 mM n-decyl- $\beta$ -D-maltoside (DM, Anatrace) for 2 h at  
357 room temperature under gentle agitation. Wild type or mutant TsFpn was added at 1:100 (w/w,  
358 protein:lipid) ratio. The detergent was removed by dialysis at 4 °C against the reconstitution  
359 buffer. Dialysis buffer was changed once a day and the liposomes were harvested after 4 days,  
360 aliquoted, and frozen at -80 °C.

361

### 362 **Divalent metal ion flux assay**

363 Liposomes were mixed with 250  $\mu$ M calcein and frozen-thawed three times. After the liposomes  
364 were extruded to homogeneity with 400 nm filter (NanoSizer<sup>TM</sup> Extruder, T&T Scientific  
365 Corporation), free calcein was removed through a desalting column (PD-10, GE Healthcare)  
366 equilibrated with the dialysis buffer. Calcein fluorescence was monitored in a quartz cuvette at  
367 37°C. Fluorescence was monitored in a FluoroMax-4 spectrofluorometer (HORIBA) with 494  
368 nm excitation and 513 nm emission at 10 s intervals. The transport was initiated by the addition  
369 of 0.5 mM CoCl<sub>2</sub> or 100  $\mu$ M fresh prepared FeSO<sub>4</sub>. When Fe<sup>2+</sup> is used, 1 mM vitamin C was  
370 added in the external solution. The rate of ion transport is estimated by the initial slope of the  
371 traces of fluorescence quench.

372

373 In experiments when internal solution needs to be replaced, liposomes were centrifuged at  
374 47000g for 30 min and resuspended in a desired internal solution. A fluorescent dye was then

375 loaded into the liposomes by the same freeze-thaw processes and free dye was removed by a  
376 desalting column.

377

### 378 **Pyranine assay**

379 Liposomes were centrifuged at 47000g for 30 min and resuspended in inside buffer (5 mM Tris,  
380 pH 8.5, 100 mM NaCl). Liposomes were mixed with 250  $\mu$ M pyranine and 2 mM  $\text{CoCl}_2$  and  
381 frozen-thawed three times. After the liposomes were extruded to homogeneity with 400 nm filter  
382 (NanoSizer<sup>TM</sup> Extruder, T&T Scientific Corporation), free dye was removed through a desalting  
383 column (PD-10, GE Healthcare) equilibrated with the outside buffer (5 mM HEPES, pH 7.5, 100  
384 mM NaCl, 2 mM  $\text{CoCl}_2$ ). Pyranine fluorescence was monitored in a quartz cuvette at 37°C in a  
385 FluoroMax-4 spectrofluorometer (HORIBA) with 460 nm excitation and 510 nm emission at 10  
386 s intervals. The transport was initiated by the addition of 2 mM EDTA.

387

### 388 **Isothermal titration calorimetry**

389 Protein samples were purified as described above and concentrated to around 50-100  $\mu$ M (3-6  
390 mg/ml). TsFpn was in the ITC buffer that contains 20 mM HEPES pH 7.5, 150 mM NaCl, 1 mM  
391 DDM. The ITC measurements were performed with a Nano ITC microcalorimeter (TA  
392 Instruments) at 25 °C.  $\text{CoCl}_2$  stock at 5 mM was prepared in the same ITC buffer injected 25  
393 times (1.01  $\mu$ l for injection 1 and 2.02  $\mu$ l for injections 2–15), with 175 s intervals between  
394 injections. The background data obtained from injecting  $\text{Co}^{2+}$  into the ITC buffer were subtracted  
395 before the data analysis. The data were fitted using the Origin8 software package (MicroCal).  
396 Measurements were repeated three times.

397

398 **Acknowledgments**

399 This work was supported by grants from NIH (DK122784, HL086392 and GM098878 to MZ),  
400 Cancer Prevention and Research Institute of Texas (R1223 to MZ). Ara Parseghian Medical  
401 Research Foundation (to N.Y.). N.Y. is supported by the Shirley M. Tilghman endowed  
402 professorship from Princeton University. We thank Paul Shao for technical support during EM  
403 image acquisition. We acknowledge the use of Princeton's Imaging and Analysis Center, which  
404 is partially supported by the Princeton Center for Complex Materials, and the National Science  
405 Foundation (NSF)-MRSEC program (DMR-1420541).

406

407 **Data Availability**

408 The atomic coordinates of TsFpn-Fab complex have been deposited in the PDB  
409 (<http://www.rcsb.org>) under the accession codes 6VYH. The corresponding electron microscopy  
410 maps have been deposited in the Electron Microscopy Data Bank  
411 (<https://www.ebi.ac.uk/pdbe/emdb/>) under the accession codes EMD-21460.

412

413 **Author Contributions**

414 M.Z., Z.R., Y.P., and J.S. conceived the project. S.G. led the effort of cryo-EM grid  
415 preparation, data collection and analysis and was assisted by Z.R., J.S. and L.W.. Y.P., Z.R.,  
416 J.S., L.W., Y.Y., H.Z., Z.X., P.B. and A.L. conducted experiments. Y.P., Z.R., G.S., J.S., Z.X.,  
417 P.B., A.L., N.Y. and M.Z. analyzed data. Z.R., J.S., Y.P. and M.Z. wrote the initial draft and  
418 all authors participated in revising the manuscript.

419

420 **Competing interests**

421 The authors declare no competing financial interests.

422

423 **Corresponding authors**

424 Correspondence to Ming Zhou (mzhou@bcm.edu) and Yaping Pan (yaping.pan@bcm.edu).

425

426

427 **Figures and Legends**

428

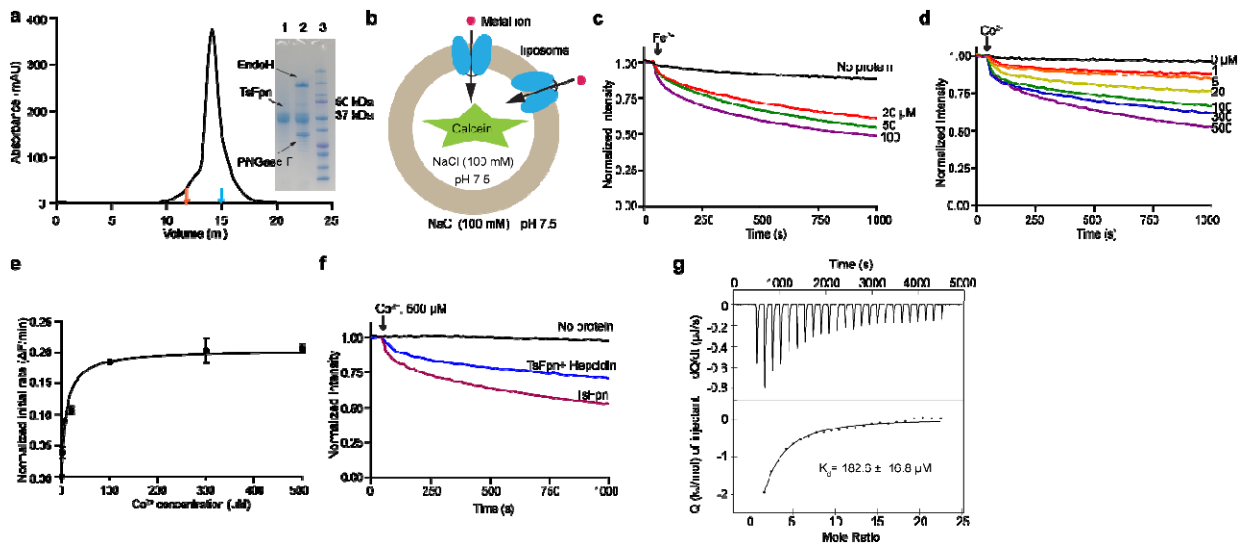

429

430 **Figure 1. Function of purified TsFpn. a.** Size-exclusion chromatography profile of TsFpn in  
 431 detergent DDM. Elution volumes of membrane proteins of known molecular weight, bcMalT  
 432 (100 kDa, orange)<sup>48</sup> and mouse SCD1 (41 kDa, blue)<sup>32</sup> are marked by arrows. Inset: SDS-PAGE  
 433 of purified TsFpn (Lane 1), purified TsFpn with EndoH glycosidase (Lane 2), and standard  
 434 molecular weight marker (Lane 3). Molecular weights of two the markers are labeled on the right.  
 435 **b.** Schematic view of a TsFpn containing proteoliposome with calcein dye enclosed. Influx of  
 436 metal ions (Fe<sup>2+</sup> or Co<sup>2+</sup>, red spheres) quenches the fluorescence. Two orientations of TsFpn are  
 437 shown. **c.** Quench of fluorescence in the presence of various concentrations of external Fe<sup>2+</sup> at  
 438 the presence of 1 mM vitamin C for liposomes with no protein (black line) or liposomes with  
 439 TsFpn. **d.** Quench of fluorescence in the presence of different concentrations of external Co<sup>2+</sup>. **e.**  
 440 Initial rate of fluorescence quench versus concentration of Co<sup>2+</sup>. The solid line is the data fit to a  
 441 Michaelis Menten equation. **f.** Quench of fluorescence in the presence of 500 μM Co<sup>2+</sup> for  
 442 liposomes with no protein (black line), proteoliposomes with TsFpn (red line), or  
 443 proteoliposomes with TsFpn and with 1 μM hepcidin added to the external side of the liposomes

444 (blue line). **g.** ITC measurement of  $\text{Co}^{2+}$  binding to TsFpn. Each spike is rate of heat release  
445 (upper panel) and each point is the integration of the spike (lower panel). The solid line in the  
446 lower panel is fit of the data to a single binding site. Each data point in **e** is the average of 3 or  
447 more measurements, and the error bars are standard error of the mean (s.e.m.).  
448

449

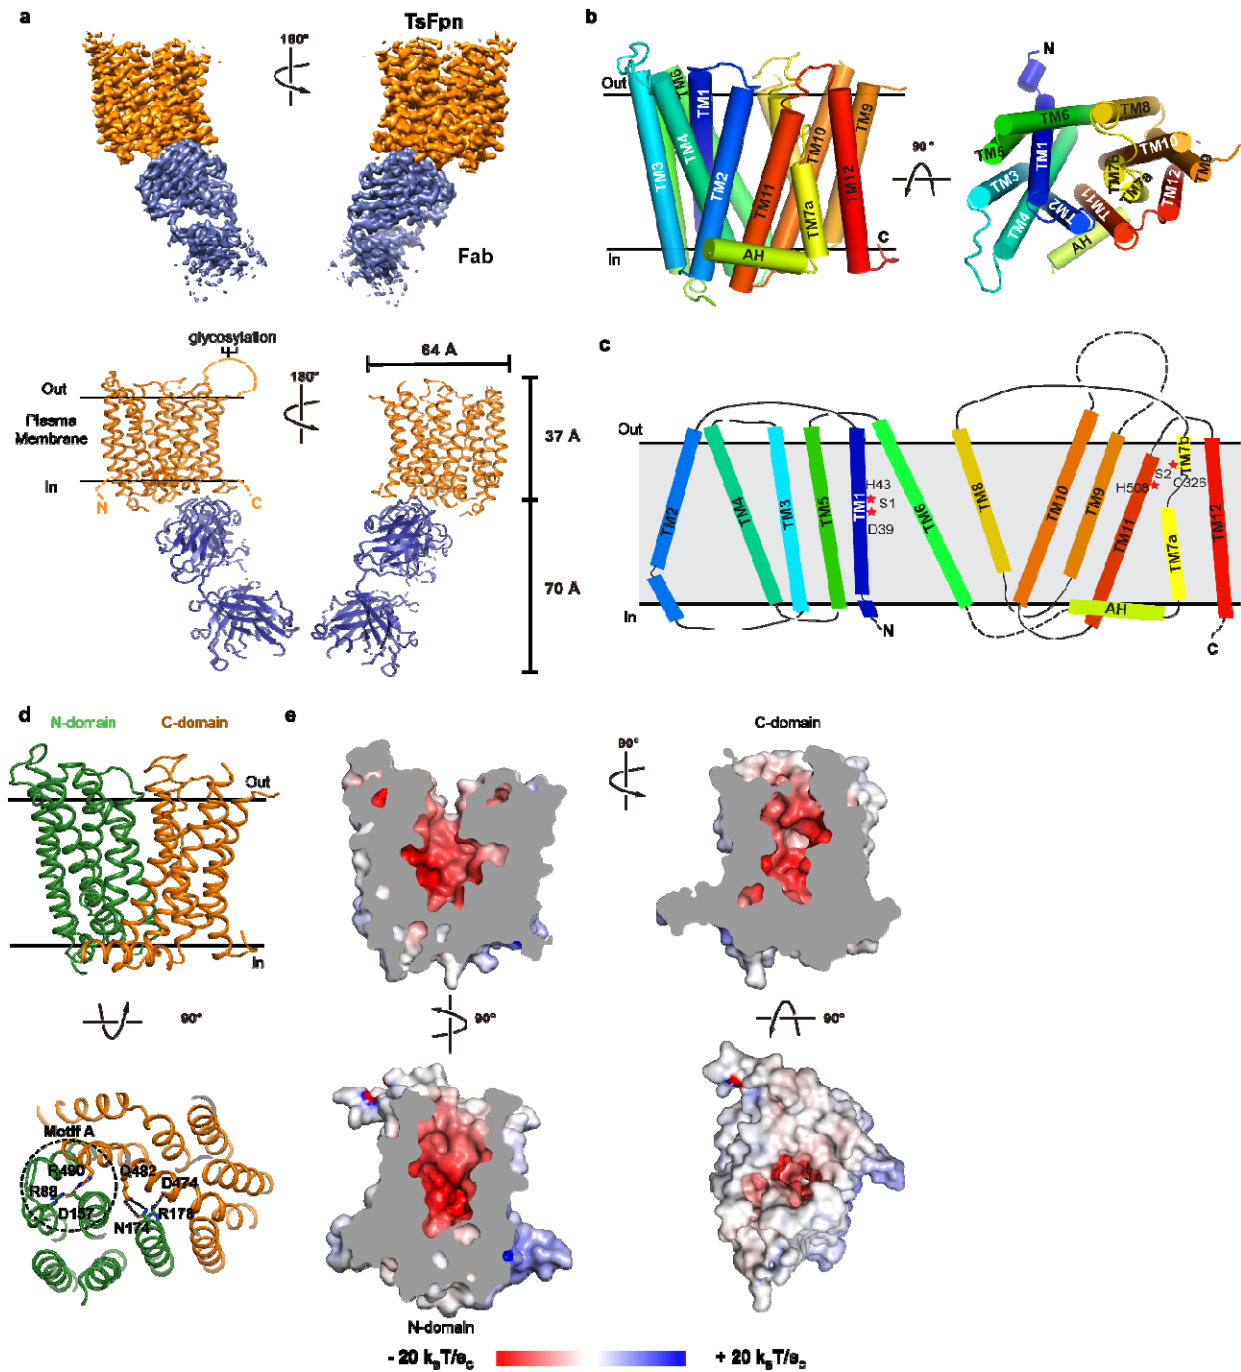

450

451 **Figure 2. Structure of TsFpn. a.** Top panel: cryo-EM map of TsFpn (orange) in complex with

452 Fab (blue) in two views. Bottom panel: TsFpn in complex with Fab shown as ribbon

453 representation. **b.** TsFpn structure shown as cylinder representation and in two views. **c.** topology

454 of TsFpn. Regions that are not resolved in the structure are marked as dotted lines. **d.** Top: The  
455 N- and C-domains of TsFpn shown in green and orange, respectively. Bottom: TsFpn viewed  
456 from the intracellular side. Interacting residues from the N- and C-domains are marked as sticks.  
457 **e.** Electrostatic static potential of TsFpn mapped onto the surface representation. The cut-away  
458 views show the large cavity formed between the N- and C- domains. Electrostatic static potential  
459 is calculated by APBS<sup>49</sup> in Pymol.  
460



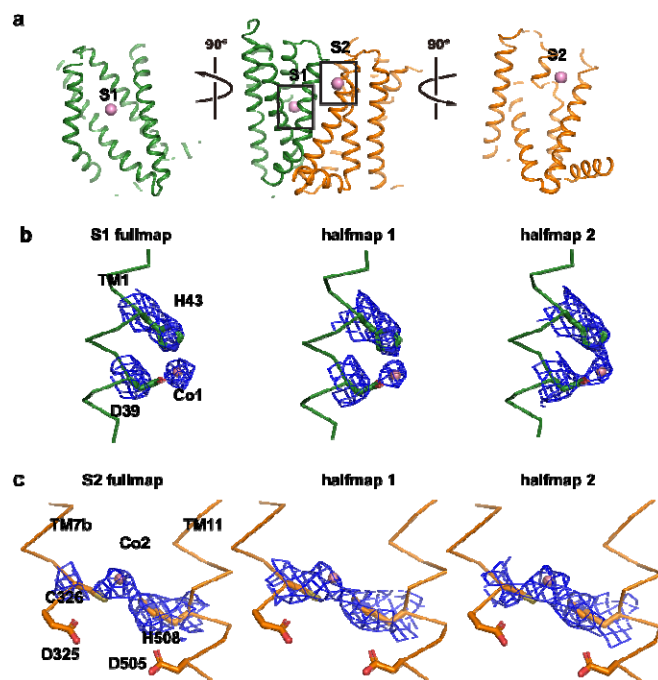

461

462 **Figure 3. Two ion binding sites in TsFpn. a.** TsFpn in cartoon representation is shown in three

463 orientations with S1 and S2 marked as sticks. **b.** Density maps of S1 are shown in blue mesh.

464 Part of the TM1 is shown as trace and the side chains of Asp39 and His43 are shown in stick.

465 Co<sup>2+</sup> is shown as a magenta sphere. **c.** Density maps of S2 are shown in blue mesh. Part of the

466 TM7 and 11 are shown as trace and the side chains of Asp325, Cys326, Asp505 and His508 are

467 shown as sticks.

468

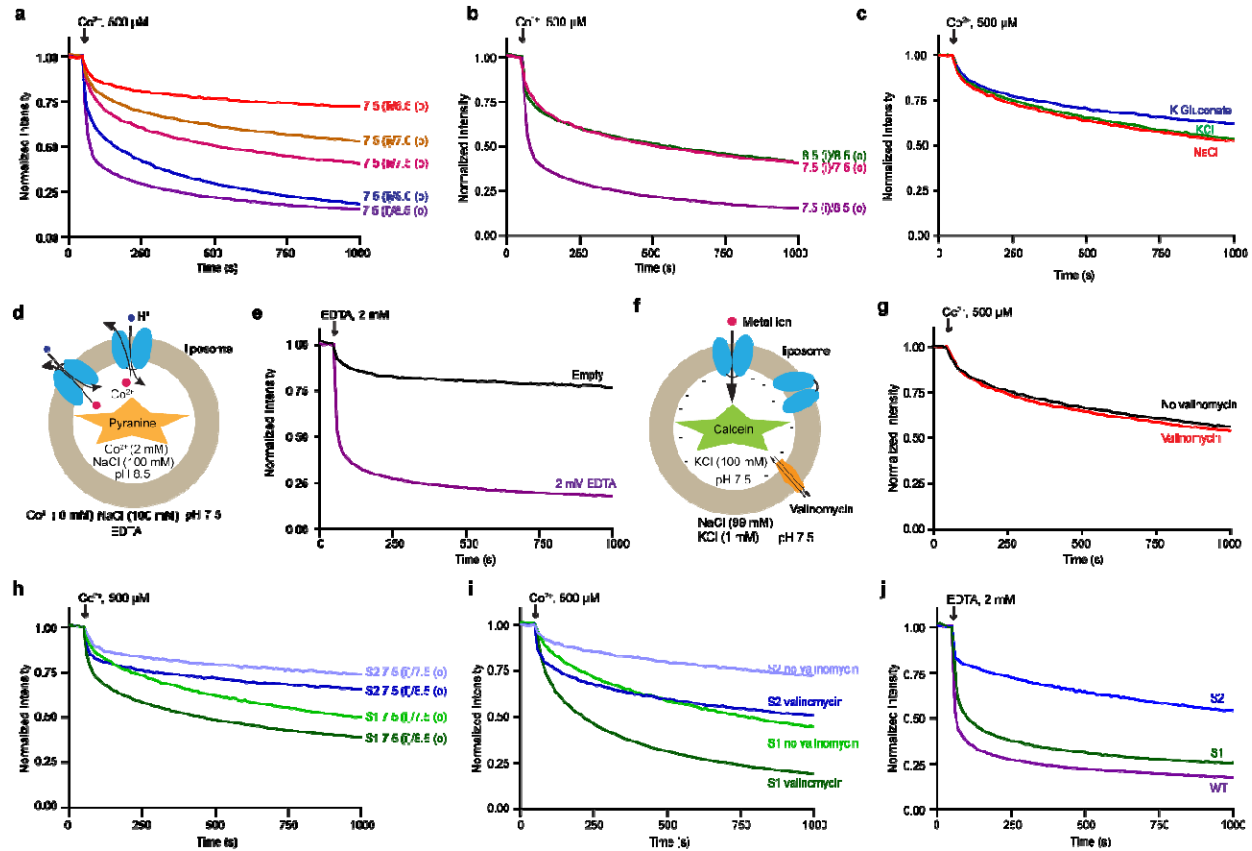

469

470 **Figure 4. TsFpn is a H<sup>+</sup>/Fe<sup>2+</sup> antiporter. a.** Quench of calcein fluorescence over time measured  
 471 in different external pH from 6.5 to 8.5. The internal pH is 7.5. **b.** Quench of calcein  
 472 fluorescence over time measured in symmetrical pH, 7.5 inside (i) and 8.5 outside (o). The trace  
 473 for symmetrical pH 7.5 and the trace for pH 7.5 (internal)/pH8.5 (external) are the same in **a**. **c.**  
 474 Quench of fluorescence under symmetrical KCl, symmetrical NaCl, and symmetrical K-  
 475 Gluconate. **d.** Schematic view of a TsFpn containing proteoliposome for monitoring H<sup>+</sup> influx. **e.**  
 476 Quench of pyranine fluorescence after addition of EDTA to the external solution. **f.** Schematic  
 477 view of a TsFpn containing proteoliposome with calcein dye enclosed. KCl is 100 mM inside of  
 478 the liposomes and 1 mM outside. Valinomycin is added to clamp the membrane potential at ~-  
 479 120 mV. **g.** Quench of calcein fluorescence over time measured with and without addition of  
 480 valinomycin under the conditions shown in **f**. **h.** Co<sup>2+</sup> transport of S1 and S2 mutants under

481 symmetrical and unsymmetrical pH. **i.** Quench of calcein fluorescence over time measured with  
482 and without addition of valinomycin under the conditions shown in **f.** **j.** Quench of pyranine  
483 fluorescence for S1 and S2 mutants.  
484

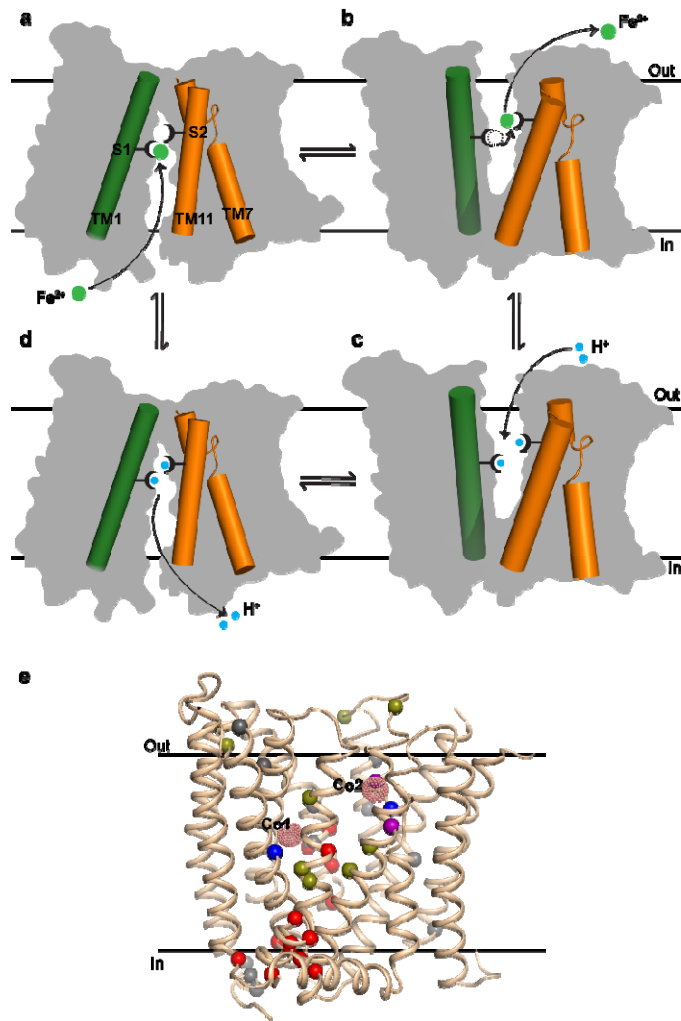

485

486 **Figure 5. Proposed mechanism of ion transport and disease-related mutations in Fpn. a-d.**

487 Proposed conformational changes of Fpn during the transport cycle. A cytosolic  $\text{Fe}^{2+}$  ion (green

488 sphere) binds to either the S1 or S2 sites (drawn as forks) of a Fpn at the inward-facing

489 conformation (a); Fpn then switches to the outward-facing conformation to allow the bound  $\text{Fe}^{2+}$

490 to escape to the extracellular side (b). Two protons bind to the S1 and S2 sites in an outward-

491 facing conformation of Fpn (c) and enter the cytosol when Fpn returns to the inward-facing

492 conformation (d). e. Cartoon representation of TsFpn. The bound  $\text{Co}^{2+}$  ions are shown as pink

493 dots.  $\text{Ca}$  of disease-related missense mutations are shown as spheres. Mutations close to the ion

494 binding sites are colored blue, those at the interface between the N and C domains are colored

495 red, and ones that are reported to affect hepcidin binding and endocytosis are colored olive.

496 Cys326 and His508 are shown in purple. All other mutations are colored in grey.

497

498 **Extended Data**

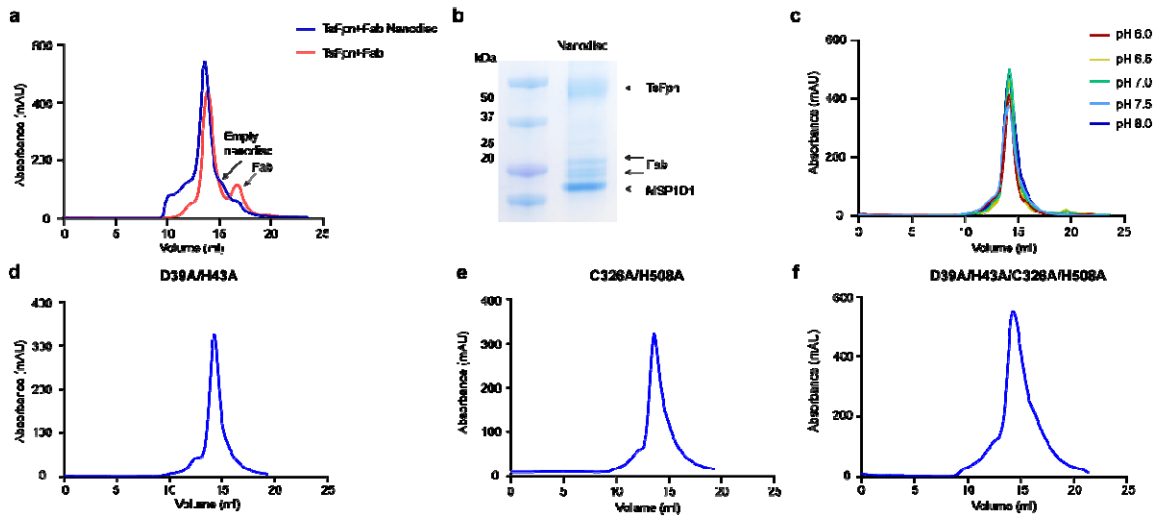

499

500 **Extended Data Figure 1. Wild type and mutant TsFpn proteins. a.** Size-exclusion  
501 chromatography of TsFpn in complex with Fab of 11F9 before and after reconstitution into  
502 nanodiscs. **b.** SDS-PAGE of the reconstitution. **c.** Size-exclusion chromatography of TsFpn in  
503 pH ranging from 6.0 to 8.5. **d-f.** Size-exclusion chromatography of TsFpn with S1 (D39A/H43A),  
504 S2 (C326A/H508A) and S1+S2 (D39A/H43A/C326A/H508A) mutations.

505

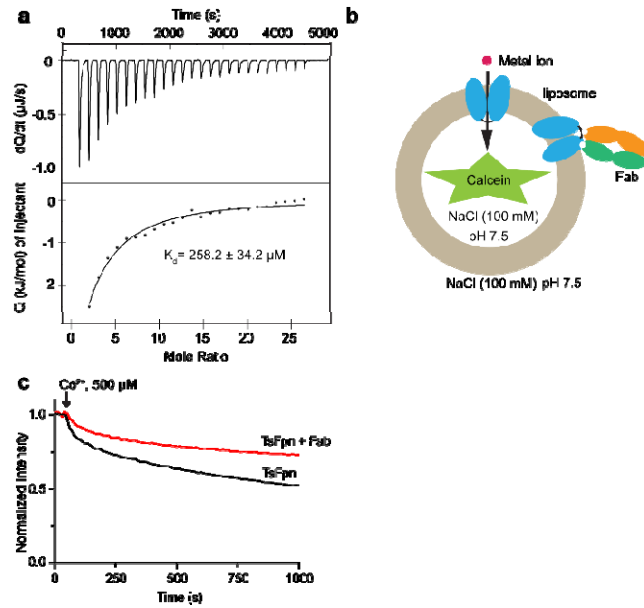

506

507 **Extended Data Figure 2. Effect of Fab on  $Co^{2+}$  binding and transport. a.** ITC measurement

508 of  $Co^{2+}$  binding to TsFpn in the presence of 11F9 Fab. **b.** Schematic illustration of a

509 proteoliposome with TsFpn in both orientations. The liposomes are loaded with calcein and the 1

510  $\mu$ M of 11F9 Fab was added to the external side of the liposomes. **c.** Quench of calcein

511 fluorescence in the absence (black trace) and presence of 1  $\mu$ M 11F9 Fab (red trace).

512

513

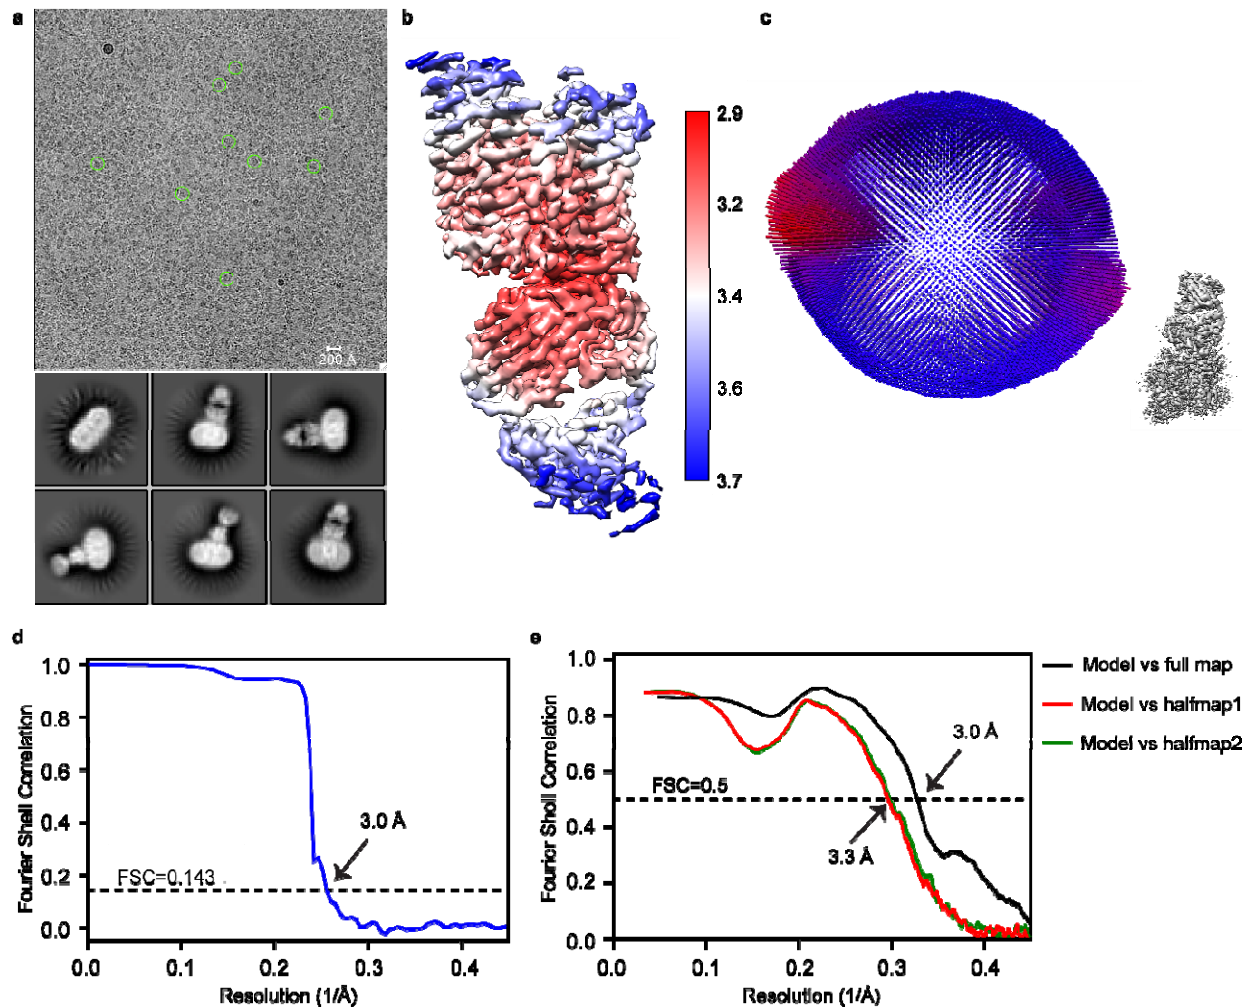

514

515 **Extended Data Figure 3. Cryo-EM analysis of the TsFpn-Fab complex reconstituted in**

516 **nanodisc. a.** Representative electron micrograph and 2D class averages of cryo-EM particle

517 **images. b.** Local resolution map for the 3D reconstruction of the TsFpn-Fab complex. **c.** Euler

518 **angle distribution of the TsFpn-Fab complex in the final 3D reconstruction. d.** The gold-standard

519 **Fourier shell correlation curve for the final map. e.** FSC curve of the refined model of the TsFpn-

520 **Fab complex versus the full map (black) and individual halfmaps (red and green).**

521

522



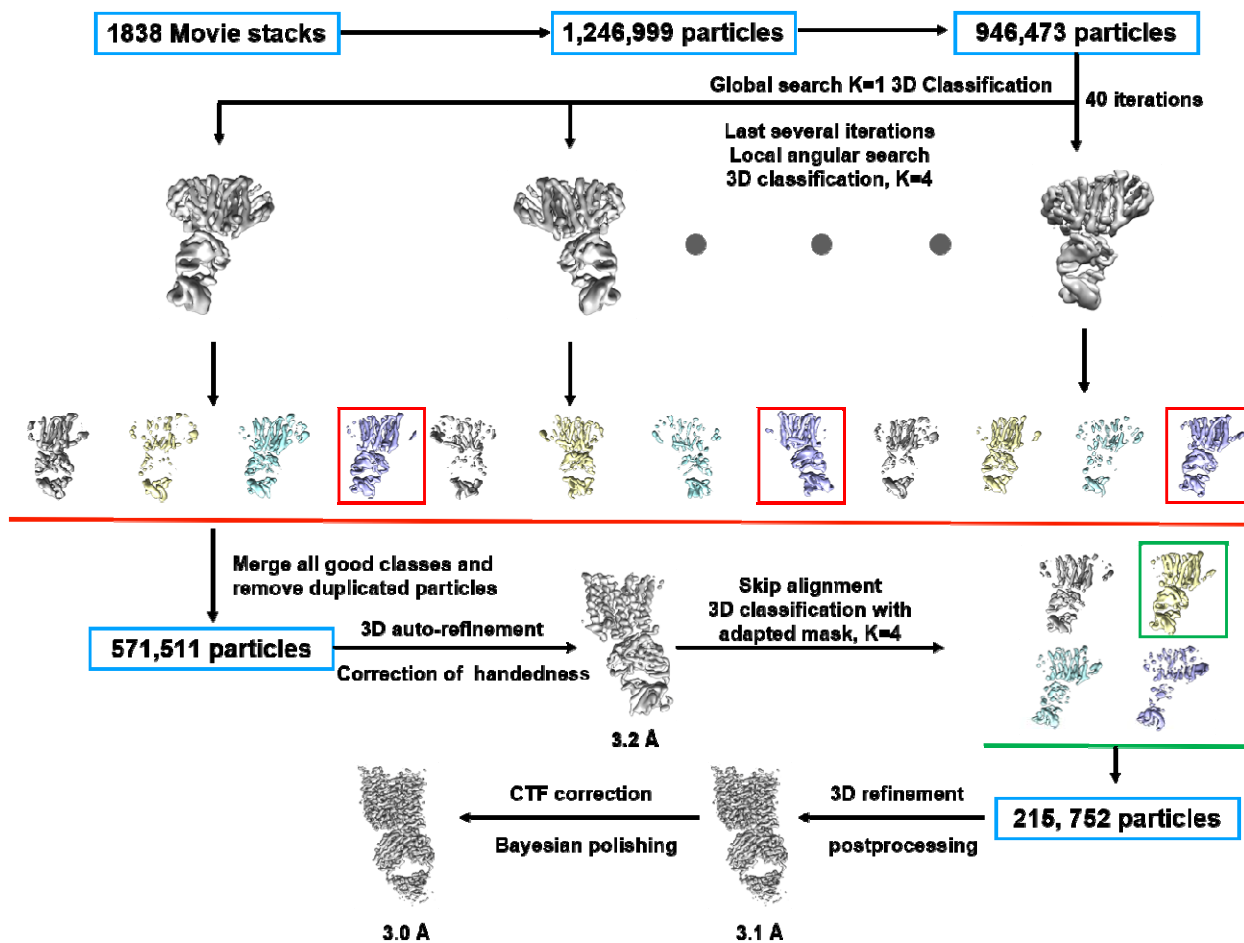

523

524 **Extended Data Figure 4. Flow chart of Cryo-EM data processing.**

525

526

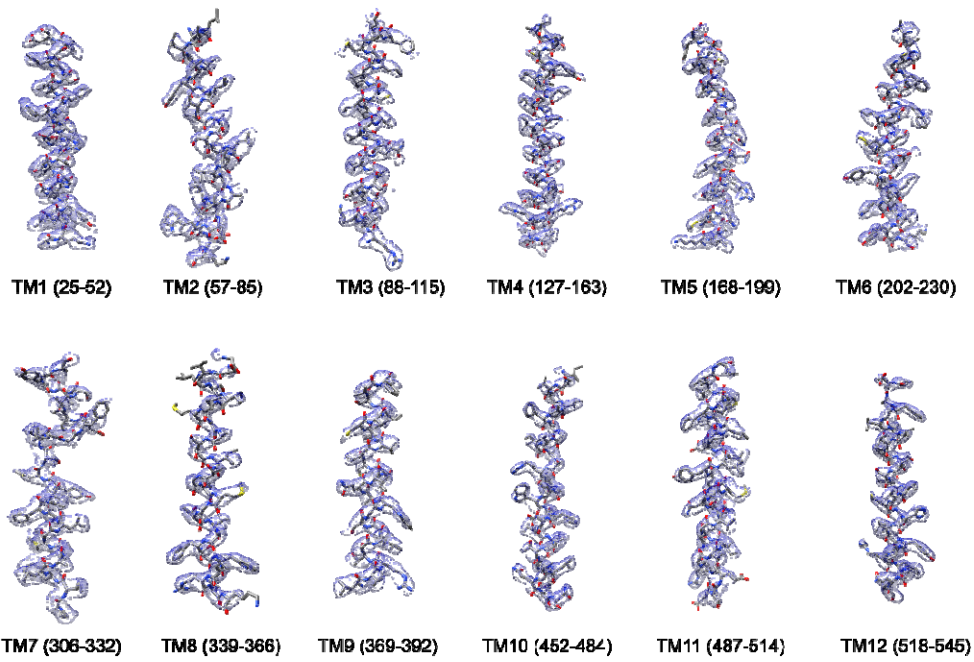

527

528

529 **Extended Data Figure 5. Representative densities of TsFpn.**

530

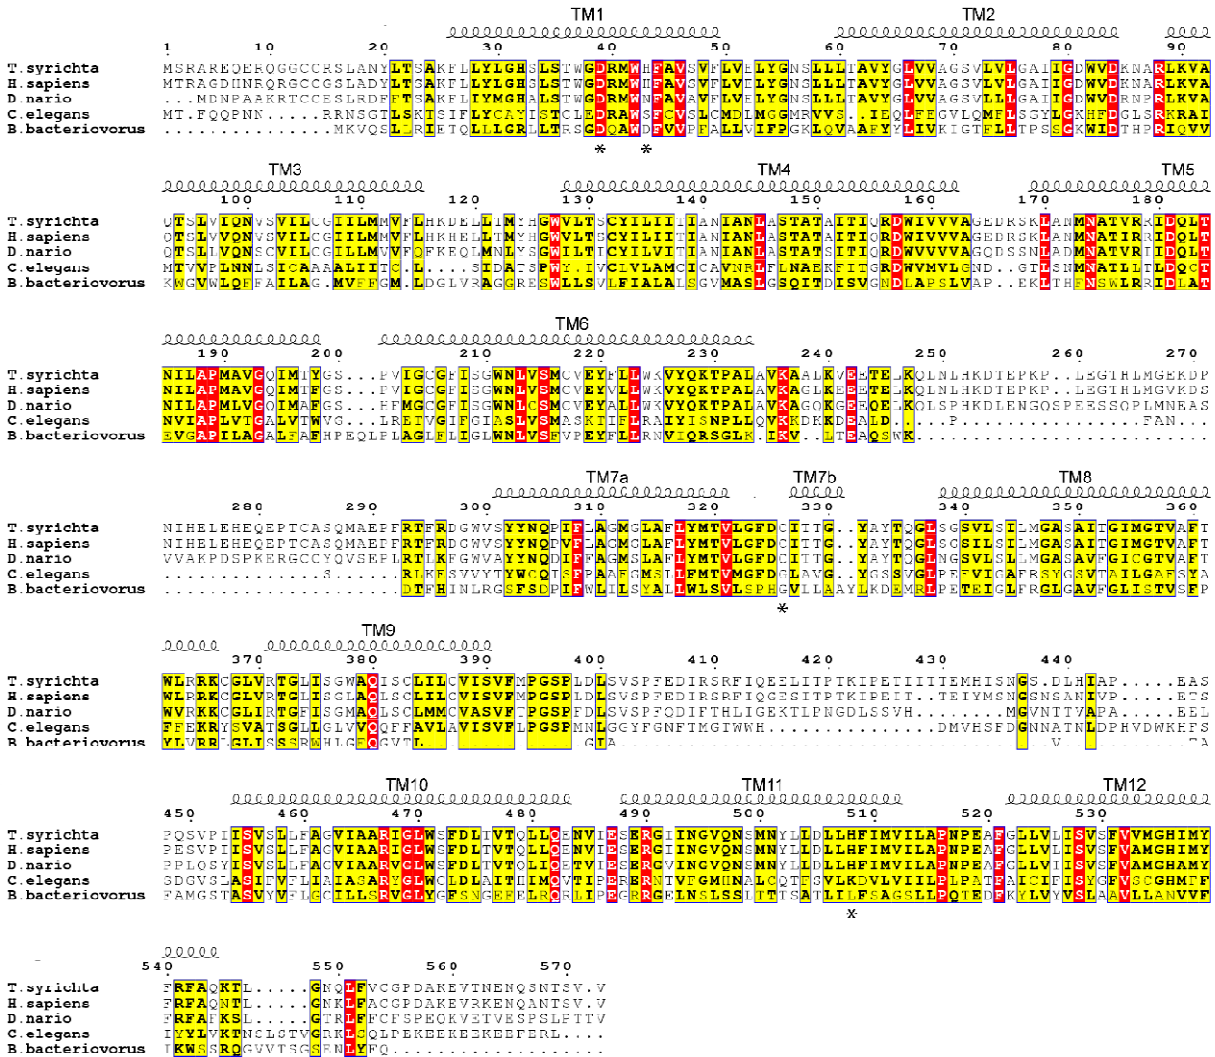

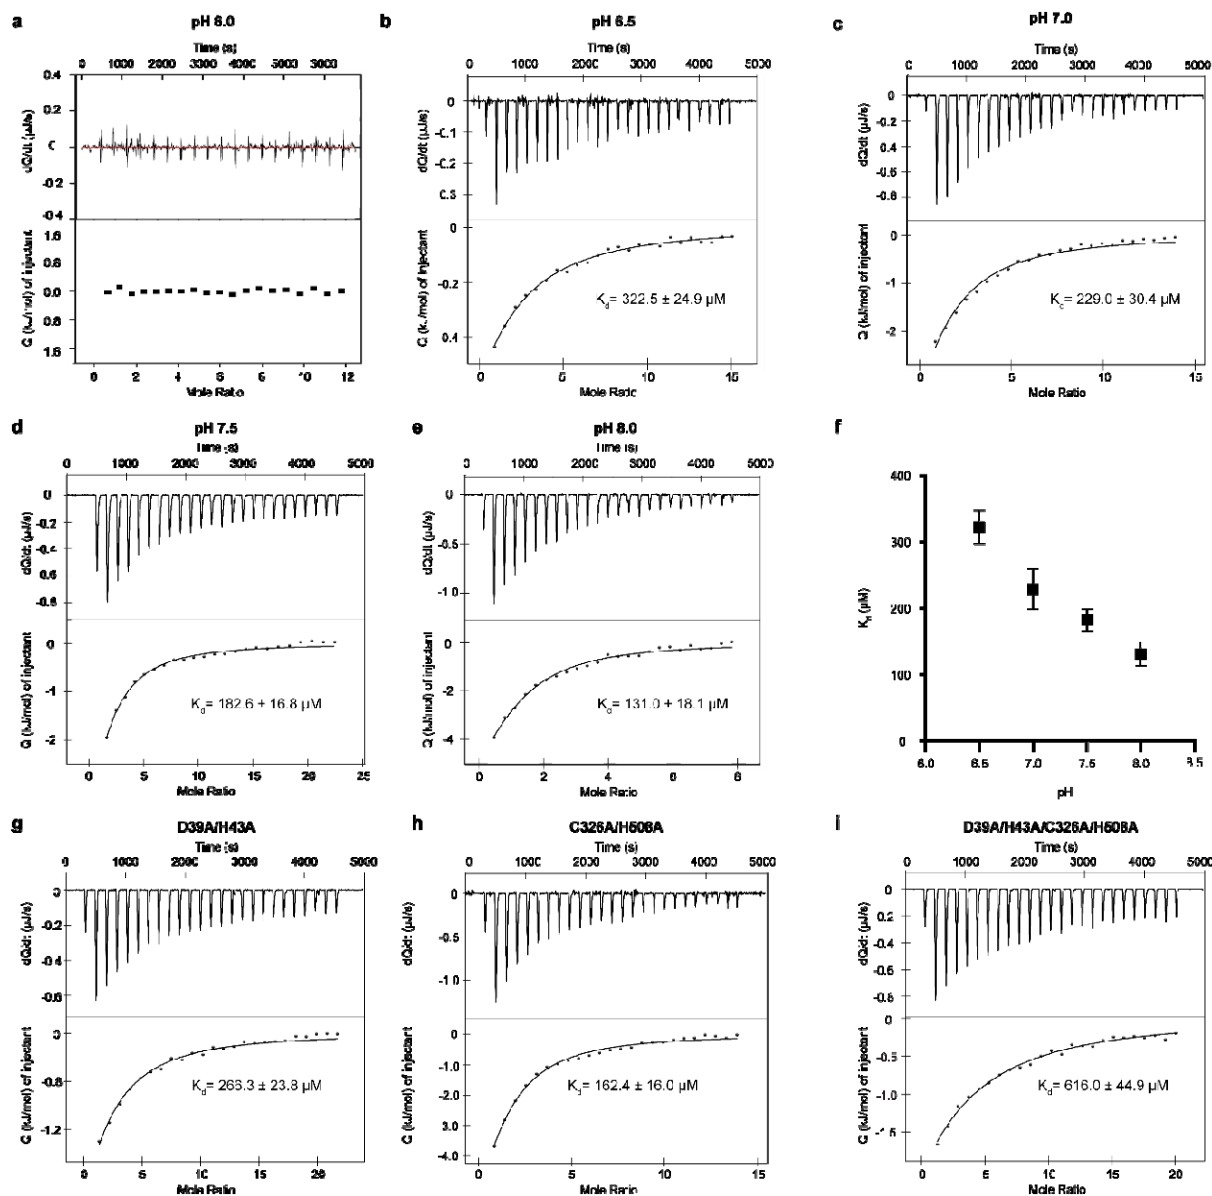

538

539 **Extended Data Figure 7. ITC measurements of  $\text{Co}^{2+}$  binding in different pH. ITC**

540 measurements of  $\text{Co}^{2+}$  binding to TsFpn in pH 6.0 (a); pH 6.5 (b); pH 7.0 (c); pH 7.5 (d); pH 8.0

541 (e). f.  $K_d$  of  $\text{Co}^{2+}$  versus different pH. Error bars are s.e.m.. In a-e, the top panel is the rate of heat

542 release versus time and the bottom panel is heat from each injection versus the molar ratios

543 between  $\text{Co}^{2+}$  and TsFpn. Data points in b-e were fit with a single-binding site equation. ITC

544 binding experiment at each pH was repeated three times the composite  $K_d$  values were plotted in

545 f. g-i. ITC measurements of  $\text{Co}^{2+}$  binding to S1(g), S2 (h) and S1+S2 (i) mutants.

546

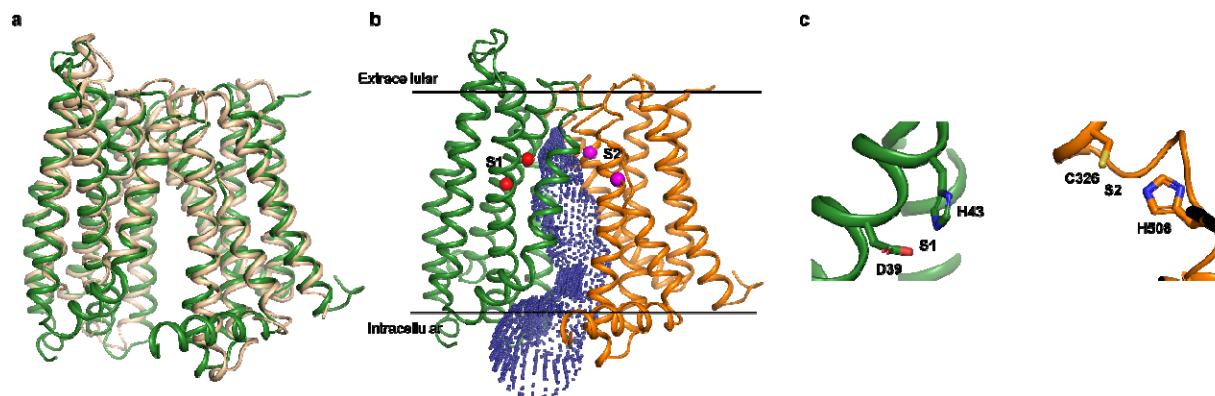

547

548 **Extended Data Figure 8. Inward-facing model of TsFpn. a.** The inward-facing model of  
549 TsFpn (cartoon in green) is superposed onto BbFpn (cartoon in wheat) in two views. **b.** cartoon  
550 representation of the inward-facing model of TsFpn with the N- and C-domains shown in green  
551 and orange, respectively. The solvent accessible regions in the cavity, calculated by HOLE<sup>52</sup>, is  
552 shown as blue dots. C-alphas of S1 and S2 are shown as spheres and colored red and magenta,  
553 respectively. **c.** Close view of S1 and S2 with side chains shown as sticks.

554

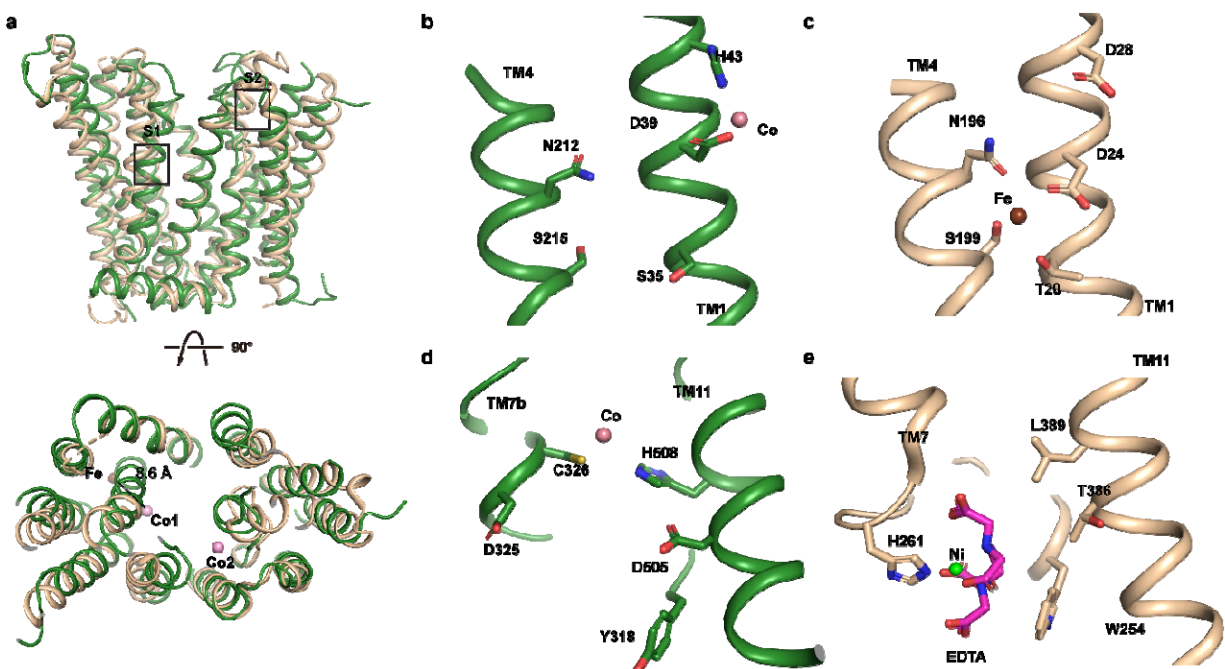

555

556 **Extended Data Figure 9. Comparison of ion binding sites in TsFpn and BbFpn. a.** TsFpn

557 (cartoon in green) is superposed onto BbFpn (cartoon in wheat) in two views. **b and d.** Ion

558 binding sites in TsFpn. **c and e.** Ion binding sites in BbFpn.

559

560 **Extended Data Table 1 | Summary of Cryo-EM data collection, processing and structure**

561 **refinement**

| <b>Protein</b>                               | <b>TsFpn-Fab</b> |
|----------------------------------------------|------------------|
| <b>Cryo-EM Data Collection</b>               |                  |
| Voltage (kV)                                 | 300              |
| Magnification (x)                            | 105,000          |
| Pixel Size (Å)                               | 1.114            |
| Electron exposure (e-/Å <sup>2</sup> /frame) | 1.56             |
| Defocus range (µm)                           | [-2.0, -1.2]     |
| Number of image stacks                       | 1838             |
| Number of frames per stack                   | 32               |
| <b>Cryo-EM Data Processing</b>               |                  |
| Initial number of particles                  | 946,473          |
| Final number of particles                    | 215,752          |
| Symmetry imposed                             | C1               |
| Map sharpening B factor (Å <sup>2</sup> )    | -100             |
| Map resolution (Å)                           | 3.0              |
| Map resolution range (Å)                     | 2.9-3.7          |
| FSC threshold                                | 0.143            |
| <b>Model Refinement</b>                      |                  |
| Number of amino acids                        | 847              |
| Total non-hydrogen atoms                     | 5392             |
| Average B factor (Å <sup>2</sup> )           | 49.83            |
| Bond length r.m.s.d. (Å)                     | 0.005            |
| Bond angle r.m.s.d. (°)                      | 0.814            |
| Ramachandran Plot                            |                  |
| Favored (%)                                  | 92.65            |
| Allowed (%)                                  | 7.35             |
| Outliers (%)                                 | 0.00             |
| Rotamer outliers (%)                         | 0.28             |
| EMRinger Score                               | 2.56             |

562

563

564

565 Reference

- 566 1 Drakesmith, H., Nemeth, E. & Ganz, T. Ironing out Ferroportin. *Cell Metab* **22**, 777-787,  
567 doi:10.1016/j.cmet.2015.09.006 (2015).
- 568 2 Donovan, A. *et al.* The iron exporter ferroportin/Slc40a1 is essential for iron homeostasis. *Cell*  
569 *Metabolism* **1**, 191-200, doi:10.1016/j.cmet.2005.01.003 (2005).
- 570 3 Aschemeyer, S. *et al.* Structure-function analysis of ferroportin defines the binding site and an  
571 alternative mechanism of action of hepcidin. *Blood* **131**, 899-910, doi:10.1182/blood-2017-05-  
572 786590 (2018).
- 573 4 Nemeth, E. *et al.* Hepcidin Regulates Cellular Iron Efflux by Binding to Ferroportin and Inducing  
574 Its Internalization. *Science* **306**, 2090, doi:10.1126/science.1104742 (2004).
- 575 5 Pietrangelo, A. Ferroportin disease: pathogenesis, diagnosis and treatment. *Haematologica* **102**,  
576 1972-1984, doi:10.3324/haematol.2017.170720 (2017).
- 577 6 Ganz, T. Systemic Iron Homeostasis. *Physiological Reviews* **93**, 1721-1741,  
578 doi:10.1152/physrev.00008.2013 (2013).
- 579 7 Sebastiani, G., Wilkinson, N. & Pantopoulos, K. Pharmacological Targeting of the  
580 Hepcidin/Ferroportin Axis. *Front Pharmacol* **7**, 160-160, doi:10.3389/fphar.2016.00160 (2016).
- 581 8 Crielaard, B. J., Lammers, T. & Rivella, S. Targeting iron metabolism in drug discovery and  
582 delivery. *Nat Rev Drug Discov* **16**, 400-423, doi:10.1038/nrd.2016.248 (2017).
- 583 9 Ruchala, P. & Nemeth, E. The pathophysiology and pharmacology of hepcidin. *Trends Pharmacol*  
584 *Sci* **35**, 155-161, doi:10.1016/j.tips.2014.01.004 (2014).
- 585 10 McKie, A. T. *et al.* A Novel Duodenal Iron-Regulated Transporter, IREG1, Implicated in the  
586 Basolateral Transfer of Iron to the Circulation. *Molecular Cell* **5**, 299-309, doi:10.1016/S1097-  
587 2765(00)80425-6 (2000).
- 588 11 Donovan, A. *et al.* Positional cloning of zebrafish ferroportin1 identifies a conserved vertebrate  
589 iron exporter. *Nature* **403**, 776-781, doi:10.1038/35001596 (2000).
- 590 12 Abboud, S., ¶, Haile, D. J. & ¶. A Novel Mammalian Iron-regulated Protein Involved in  
591 Intracellular Iron Metabolism. *Journal of Biological Chemistry* **275**, 19906-19912 (2000).
- 592 13 Deng, D. *et al.* Crystal structure of the human glucose transporter GLUT1. *Nature* **510**, 121-125,  
593 doi:10.1038/nature13306 (2014).
- 594 14 Deng, D. *et al.* Molecular basis of ligand recognition and transport by glucose transporters.  
595 *Nature* **526**, 391-396, doi:10.1038/nature14655 (2015).
- 596 15 Nomura, N. *et al.* Structure and mechanism of the mammalian fructose transporter GLUT5.  
597 *Nature* **526**, 397-401, doi:10.1038/nature14909 (2015).



- 598 16 Doki, S. *et al.* Structural basis for dynamic mechanism of proton-coupled symport by the peptide  
599 transporter POT. *Proceedings of the National Academy of Sciences* **110**, 11343,  
600 doi:10.1073/pnas.1301079110 (2013).
- 601 17 Newstead, S. *et al.* Crystal structure of a prokaryotic homologue of the mammalian  
602 oligopeptide–proton symporters, PepT1 and PepT2. *The EMBO Journal* **30**, 417-426,  
603 doi:10.1038/emboj.2010.309 (2011).
- 604 18 Solcan, N. *et al.* Alternating access mechanism in the POT family of oligopeptide transporters.  
605 *The EMBO Journal* **31**, 3411-3421, doi:10.1038/emboj.2012.157 (2012).
- 606 19 Wright, N. J. & Lee, S.-Y. Structures of human ENT1 in complex with adenosine reuptake  
607 inhibitors. *Nature structural & molecular biology* **26**, 599-606, doi:10.1038/s41594-019-0245-7  
608 (2019).
- 609 20 Madej, M. G., Sun, L., Yan, N. & Kaback, H. R. Functional architecture of MFS D-glucose  
610 transporters. *Proceedings of the National Academy of Sciences of the United States of America*  
611 **111**, E719-E727, doi:10.1073/pnas.1400336111 (2014).
- 612 21 Taniguchi, R. *et al.* Outward- and inward-facing structures of a putative bacterial transition-  
613 metal transporter with homology to ferroportin. *Nature communications* **6**, 8545-8545,  
614 doi:10.1038/ncomms9545 (2015).
- 615 22 Deshpande, C. N. *et al.* Calcium is an essential cofactor for metal efflux by the ferroportin  
616 transporter family. *Nature communications* **9**, 3075-3075, doi:10.1038/s41467-018-05446-4  
617 (2018).
- 618 23 Gupta, R., Jung, E. & Brunak, S. Prediction of N-glycosylation sites in human proteins. (2004).
- 619 24 Wu, S. *et al.* Fabs enable single particle cryoEM studies of small proteins. *Structure (London,*  
620 *England : 1993)* **20**, 582-592, doi:10.1016/j.str.2012.02.017 (2012).
- 621 25 Quistgaard, E. M., Löw, C., Guettou, F. & Nordlund, P. Understanding transport by the major  
622 facilitator superfamily (MFS): structures pave the way. *Nature Reviews Molecular Cell Biology* **17**,  
623 123-132, doi:10.1038/nrm.2015.25 (2016).
- 624 26 Rice, A. E., Mendez, M. J., Hokanson, C. A., Rees, D. C. & Björkman, P. J. Investigation of the  
625 biophysical and cell biological properties of ferroportin, a multipass integral membrane protein  
626 iron exporter. *Journal of molecular biology* **386**, 717-732, doi:10.1016/j.jmb.2008.12.063 (2009).
- 627 27 von Heijne, G. & Gavel, Y. Topogenic signals in integral membrane proteins. *European Journal of*  
628 *Biochemistry* **174**, 671-678, doi:10.1111/j.1432-1033.1988.tb14150.x (1988).
- 629 28 Ka, C. *et al.* The SLC40A1 R178Q mutation is a recurrent cause of hemochromatosis and is  
630 associated with a novel pathogenic mechanism. *Haematologica* **103**, 1796-1805,  
631 doi:10.3324/haematol.2018.189845 (2018).

- 632 29 Vlasveld, L. T. *et al.* Twenty Years of Ferroportin Disease: A Review or An Update of Published  
633 Clinical, Biochemical, Molecular, and Functional Features. *Pharmaceuticals (Basel)* **12**, 132,  
634 doi:10.3390/ph12030132 (2019).
- 635 30 Ehrnstorfer, I. A., Geertsma, E. R., Pardon, E., Steyaert, J. & Dutzler, R. Crystal structure of a  
636 SLC11 (NRAMP) transporter reveals the basis for transition-metal ion transport. *Nature*  
637 *Structural & Molecular Biology* **21**, 990-996, doi:10.1038/nsmb.2904 (2014).
- 638 31 Bozzi, A. T. *et al.* Crystal Structure and Conformational Change Mechanism of a Bacterial Nramp-  
639 Family Divalent Metal Transporter. *Structure (London, England : 1993)* **24**, 2102-2114,  
640 doi:10.1016/j.str.2016.09.017 (2016).
- 641 32 Bai, Y. *et al.* X-ray structure of a mammalian stearyl-CoA desaturase. *Nature* **524**, 252-256,  
642 doi:10.1038/nature14549 (2015).
- 643 33 Martens, C. *et al.* Lipids modulate the conformational dynamics of a secondary multidrug  
644 transporter. *Nature structural & molecular biology* **23**, 744-751, doi:10.1038/nsmb.3262 (2016).
- 645 34 Autzen, H. E. *et al.* Structure of the human TRPM4 ion channel in a lipid nanodisc. *Science (New*  
646 *York, N.Y.)* **359**, 228-232, doi:10.1126/science.aar4510 (2018).
- 647 35 Mastronarde, D. N. Automated electron microscope tomography using robust prediction of  
648 specimen movements. *J Struct Biol* **152**, 36-51, doi:10.1016/j.jsb.2005.07.007 (2005).
- 649 36 Zheng, S. Q. *et al.* MotionCor2: anisotropic correction of beam-induced motion for improved  
650 cryo-electron microscopy. *Nat Methods* **14**, 331-332, doi:10.1038/nmeth.4193 (2017).
- 651 37 Grant, T. & Grigorieff, N. Measuring the optimal exposure for single particle cryo-EM using a 2.6  
652 Å reconstruction of rotavirus VP6. *Elife* **4**, e06980, doi:10.7554/eLife.06980 (2015).
- 653 38 Zhang, K. Gctf: Real-time CTF determination and correction. *J Struct Biol* **193**, 1-12,  
654 doi:10.1016/j.jsb.2015.11.003 (2016).
- 655 39 Scheres, S. H. Semi-automated selection of cryo-EM particles in RELION-1.3. *J Struct Biol* **189**,  
656 114-122, doi:10.1016/j.jsb.2014.11.010 (2015).
- 657 40 Scheres, S. H. RELION: implementation of a Bayesian approach to cryo-EM structure  
658 determination. *J Struct Biol* **180**, 519-530, doi:10.1016/j.jsb.2012.09.006 (2012).
- 659 41 Kimanius, D., Forsberg, B. O., Scheres, S. H. & Lindahl, E. Accelerated cryo-EM structure  
660 determination with parallelisation using GPUs in RELION-2. *Elife* **5**, doi:10.7554/eLife.18722  
661 (2016).
- 662 42 Zivanov, J. *et al.* New tools for automated high-resolution cryo-EM structure determination in  
663 RELION-3. *elife* **7**, e42166, doi:10.7554/eLife.42166 (2018).
- 664 43 Rosenthal, P. B. & Henderson, R. Optimal determination of particle orientation, absolute hand,  
665 and contrast loss in single-particle electron cryomicroscopy. *J Mol Biol* **333**, 721-745 (2003).

- 666 44 Chen, S. *et al.* High-resolution noise substitution to measure overfitting and validate resolution  
667 in 3D structure determination by single particle electron cryomicroscopy. *Ultramicroscopy* **135**,  
668 24-35, doi:10.1016/j.ultramic.2013.06.004 (2013).
- 669 45 Emsley, P., Lohkamp, B., Scott, W. G. & Cowtan, K. Features and development of Coot. *Acta*  
670 *crystallographica. Section D, Biological crystallography* **66**, 486-501,  
671 doi:10.1107/S0907444910007493 (2010).
- 672 46 Adams, P. D. *et al.* PHENIX: a comprehensive Python-based system for macromolecular structure  
673 solution. *Acta crystallographica. Section D, Biological crystallography* **66**, 213-221,  
674 doi:10.1107/S0907444909052925 (2010).
- 675 47 Barad, B. A. *et al.* EMRinger: side chain-directed model and map validation for 3D cryo-electron  
676 microscopy. *Nature methods* **12**, 943-946, doi:10.1038/nmeth.3541 (2015).
- 677 48 Ren, Z. *et al.* Structure of an EIIc sugar transporter trapped in an inward-facing conformation.  
678 *Proceedings of the National Academy of Sciences of the United States of America* **115**, 5962-  
679 5967, doi:10.1073/pnas.1800647115 (2018).
- 680 49 Baker, N. A., Sept, D., Joseph, S., Holst, M. J. & McCammon, J. A. Electrostatics of nanosystems:  
681 Application to microtubules and the ribosome. *Proceedings of the National Academy of Sciences*  
682 **98**, 10037 (2001).
- 683 50 Sievers, F. *et al.* Fast, scalable generation of high-quality protein multiple sequence alignments  
684 using Clustal Omega. *Molecular systems biology* **7**, 539-539, doi:10.1038/msb.2011.75 (2011).
- 685 51 Robert, X. & Gouet, P. Deciphering key features in protein structures with the new ENDscript  
686 server. *Nucleic Acids Research* **42**, W320-W324, doi:10.1093/nar/gku316 (2014).
- 687 52 Smart, O. S., Neduelil, J. G., Wang, X., Wallace, B. A. & Sansom, M. S. P. HOLE: A program for  
688 the analysis of the pore dimensions of ion channel structural models. *Journal of Molecular*  
689 *Graphics* **14**, 354-360, doi:https://doi.org/10.1016/S0263-7855(97)00009-X (1996).
- 690
